# Supplementary material
Source: PubMed Central journal article supplement (PMC5269559)
Supplement: NIHMS783371-supplement-9.pdf [file NIHMS783371-supplement-9.pdf]

Supplementary Table 1

***Th::Cre***            7  
**NB *Th::Cre***        2  
**Wild-type**            4  
**Total # of rats**    13

| Experiment (Figures)                                                                | Group                           | Number of rats used | Number of rats excluded & reason                            |
|-------------------------------------------------------------------------------------|---------------------------------|---------------------|-------------------------------------------------------------|
| Quantification of sensitivity of ChR2 expression in <i>Th::Cre</i> rats (Figure 1f) | <i>Th::Cre</i>                  | 7                   | NA                                                          |
| Quantification of specificity of ChR2 expression in <i>Th::Cre</i> rats (Figure 1g) | <i>Th::Cre</i>                  | 4                   | 3 rat brain sections not stained with DAPI                  |
| ICSS behavior (Figure 1h)                                                           | <i>Th::Cre</i>                  | 4                   | 3 rats not tested in ICSS                                   |
| ICSS behavior (Figure 1h)                                                           | NB <i>Th::Cre</i>               | 2                   | NA                                                          |
| ICSS behavior (Figure 1h)                                                           | Wild-type                       | 3                   | 1 rat did not complete Session 2                            |
| Group Functional Maps BOLD (Figure 2b and Supplementary Figure 2)                   | <i>Th::Cre</i>                  | 5                   | 2 rats removed due to MABP changes and inadequate MABP data |
| Group Functional Maps CBVw (Figure 2b and Supplementary Figure 2)                   | <i>Th::Cre</i>                  | 6                   | 1 rat removed due to poor anatomical image normalization    |
| Group Functional Maps BOLD (Figure 2c)                                              | Wild-type                       | 4                   | NA                                                          |
| Group Functional Maps CBVw (Figure 2c)                                              | Wild-type                       | 4                   | NA                                                          |
| Group ROI analysis BOLD (Figure 3a, 3c and Supplementary Figure 4a)                 | <i>Th::Cre</i>                  | 5                   | 2 rats removed due to MABP changes and inadequate MABP data |
| Group ROI analysis BOLD (Figure 3a and Supplementary Figure 4a)                     | NB <i>Th::Cre</i>               | 2                   | NA                                                          |
| Group ROI analysis BOLD (Figure 3a and Supplementary Figure 4a)                     | Wild-type                       | 4                   | NA                                                          |
| Group ROI analysis CBVw (Figure 3b, 3c and Supplementary Figure 4b)                 | <i>Th::Cre</i>                  | 7                   | NA                                                          |
| Group ROI analysis CBVw (Figure 3b and Supplementary Figure 4b)                     | NB <i>Th::Cre</i>               | 2                   | NA                                                          |
| Group ROI analysis CBVw (Figure 3b and Supplementary Figure 4b)                     | Wild-type                       | 4                   | NA                                                          |
| Forepaw analysis (Supplementary Figure 3)                                           | Wild-type and NB <i>Th::Cre</i> | 6                   | NA                                                          |
| fMRI time courses BOLD (Supplemenatry Figure 5)                                     | <i>Th::Cre</i>                  | 5                   | 2 rats removed due to MABP changes and inadequate MABP data |
| fMRI time courses CBVw (Supplemenatry Figure 5)                                     | <i>Th::Cre</i>                  | 7                   | NA                                                          |
