# Supplementary material
Source: PubMed Central journal article supplement (PMC5269559)

Supplementary Figure 1

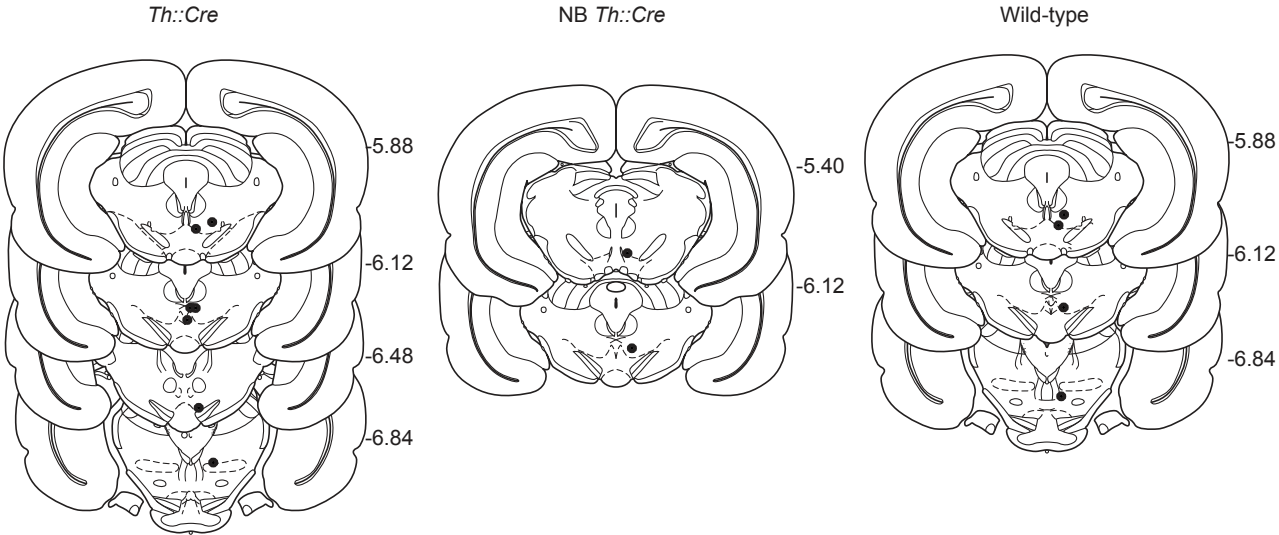

Supplement: NIHMS783371-supplement-2.pdf [file NIHMS783371-supplement-2.pdf]

Supplementary Figure 2

A

BOLD

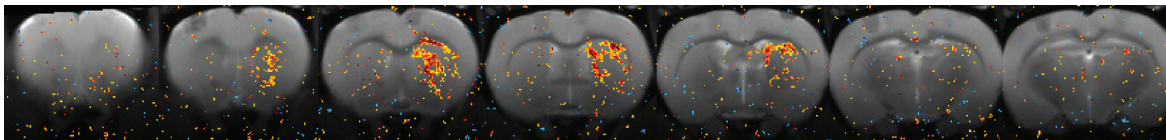

CBVw

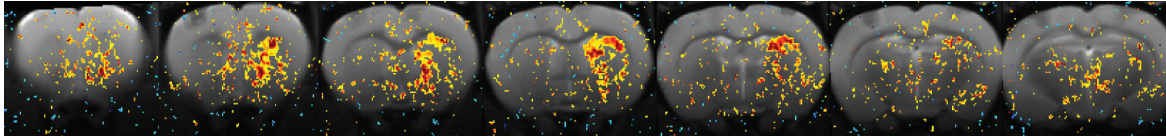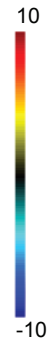

B

BOLD

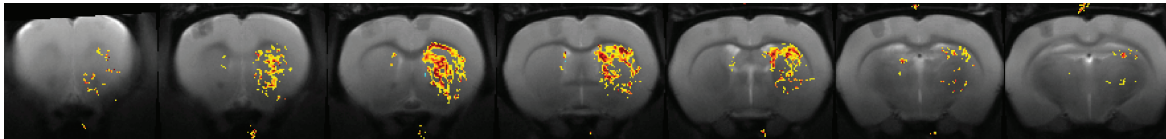

CBVw

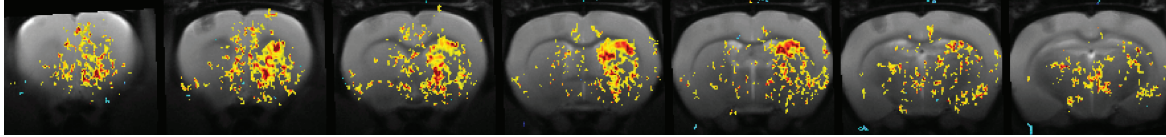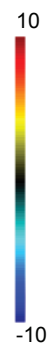

C

BOLD

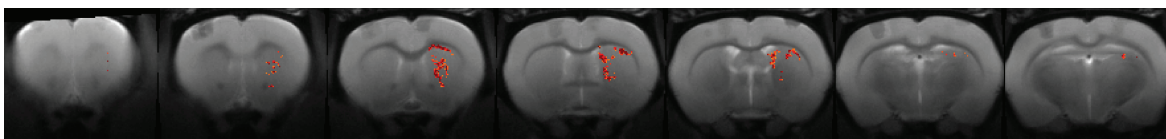

CBVw

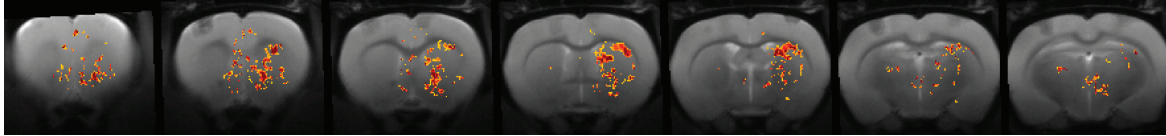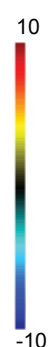

Supplement: NIHMS783371-supplement-3.pdf [file NIHMS783371-supplement-3.pdf]

A

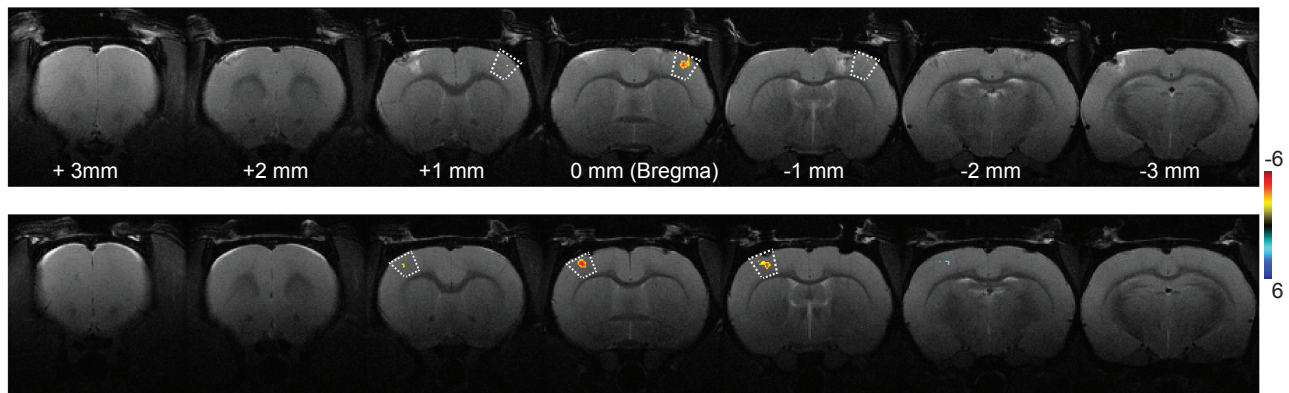

B

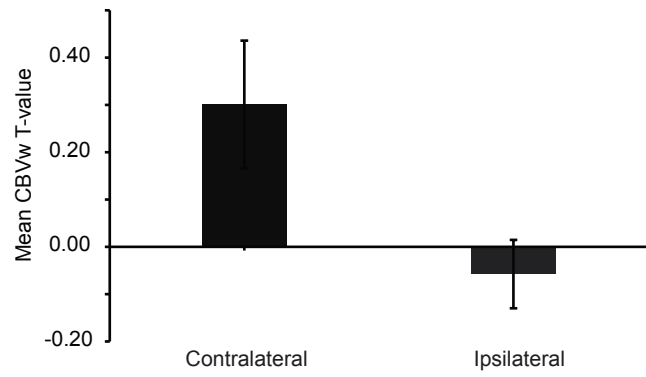

Supplement: NIHMS783371-supplement-4.pdf [file NIHMS783371-supplement-4.pdf]

Supplementary Figure 4

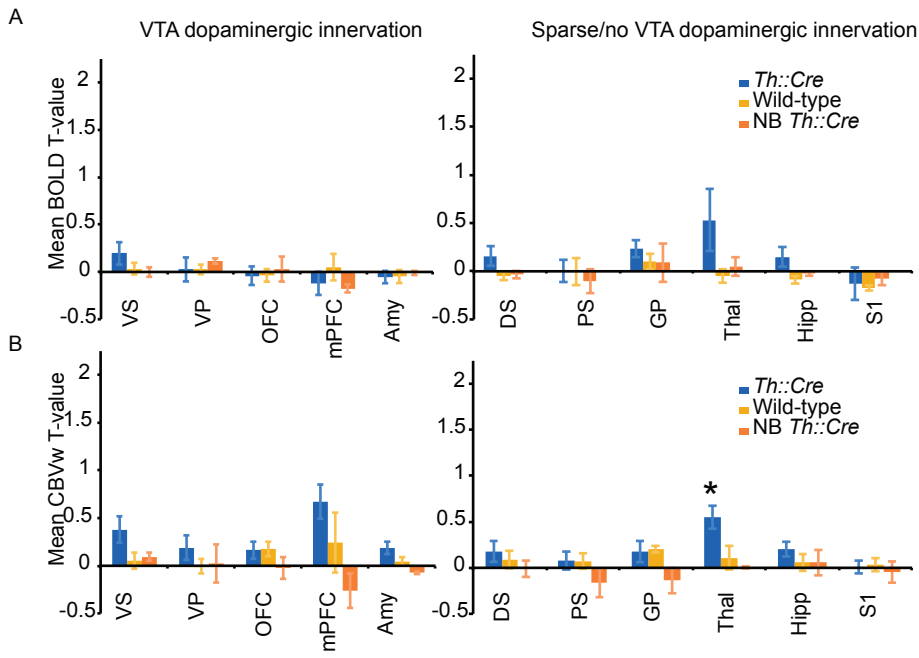

Supplement: NIHMS783371-supplement-5.pdf [file NIHMS783371-supplement-5.pdf]

Supplementary Figure 5

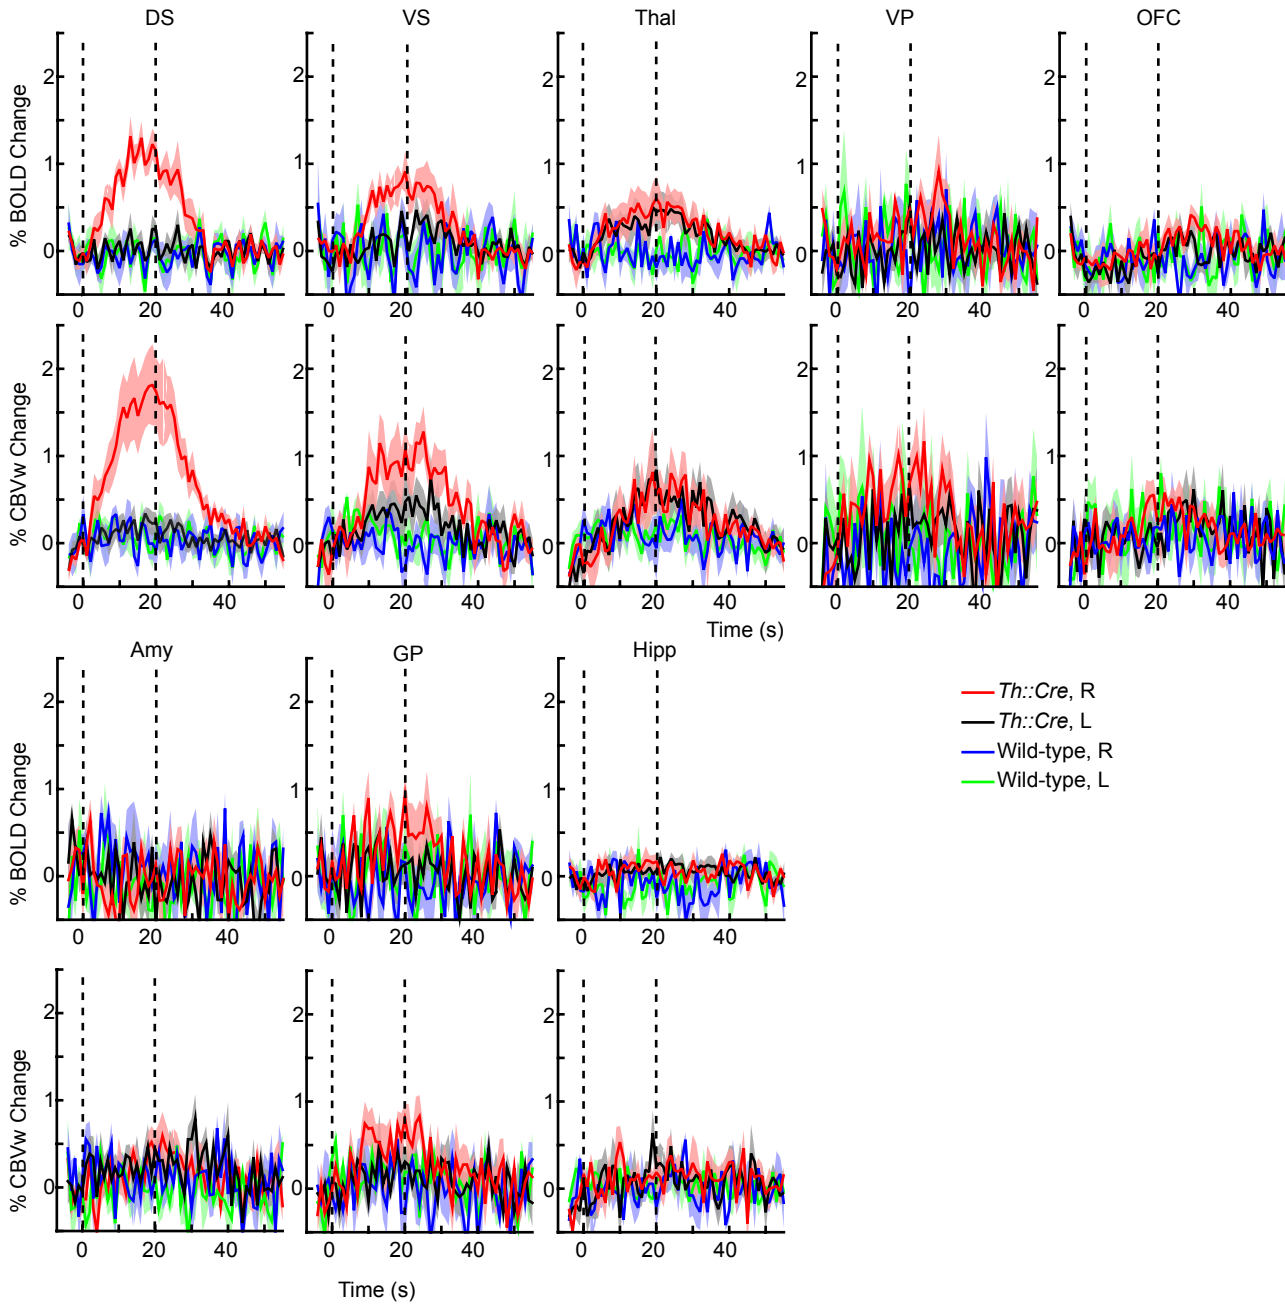

Supplement: NIHMS783371-supplement-6.pdf [file NIHMS783371-supplement-6.pdf]

Supplementary Figure 6

Rat # 3461

Rat # 4050

AP (mm)

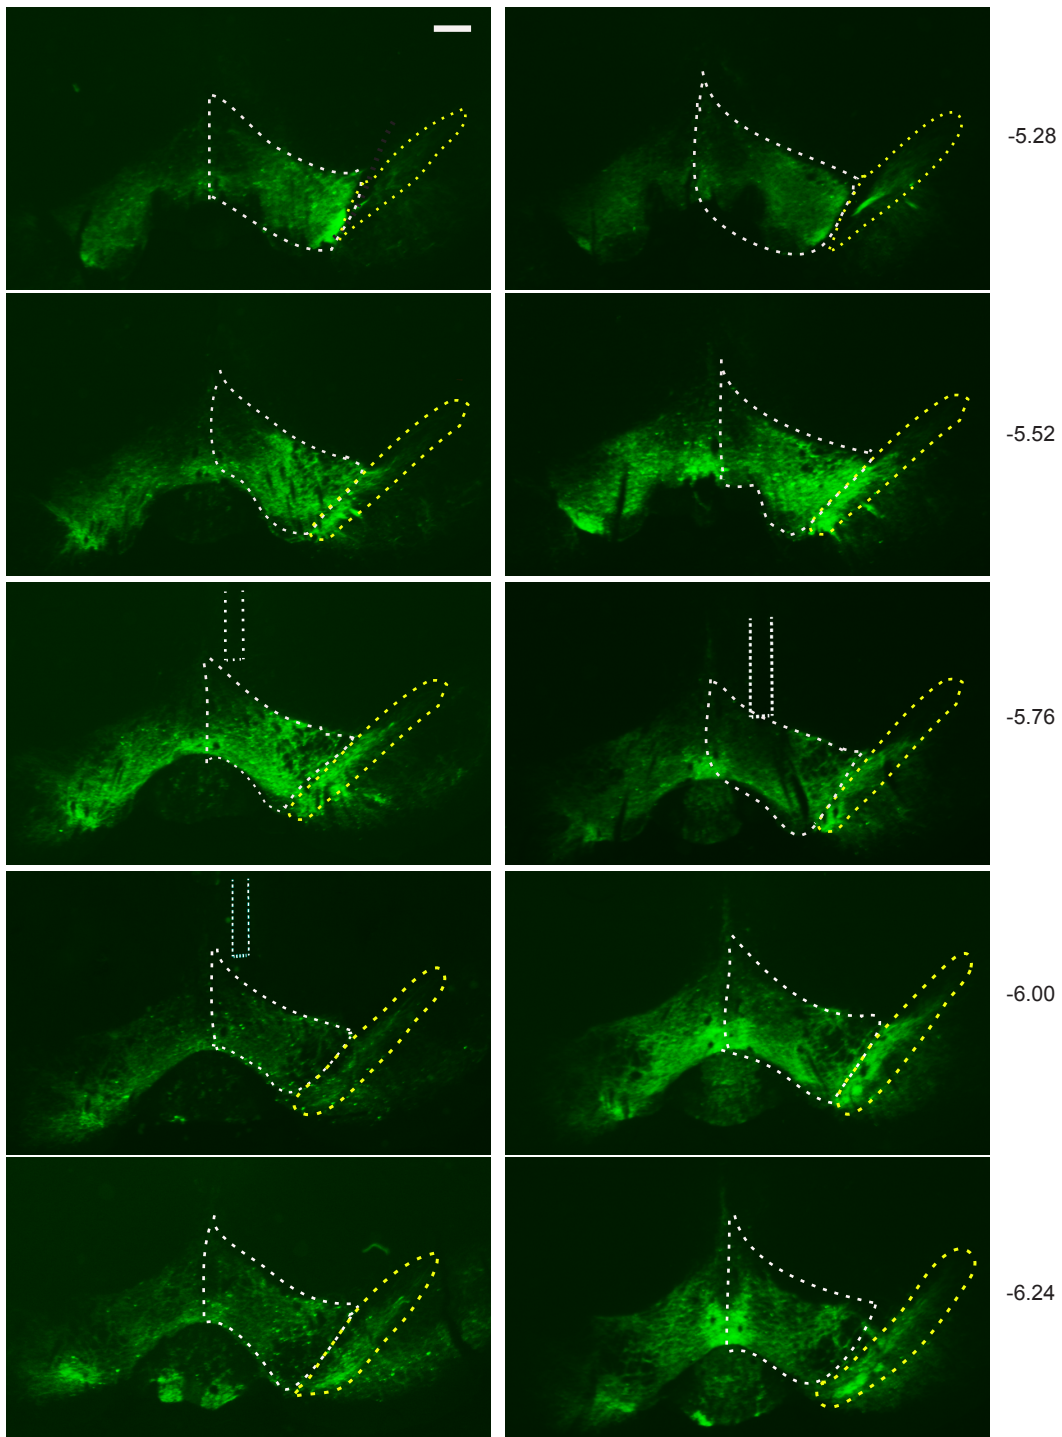

Supplement: NIHMS783371-supplement-7.pdf [file NIHMS783371-supplement-7.pdf]

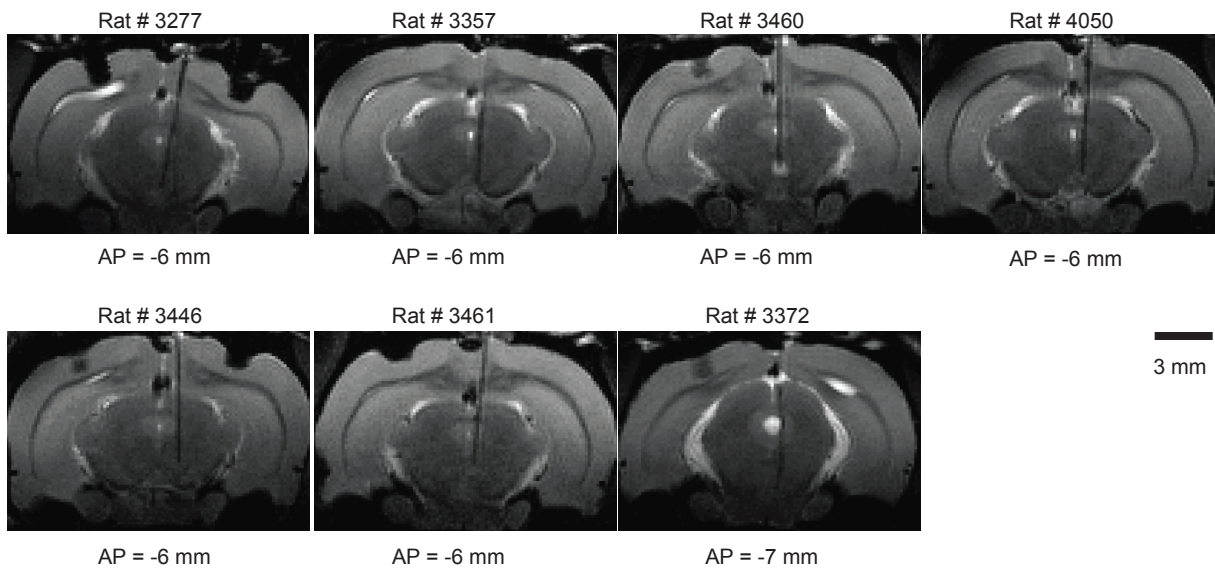

Supplement: NIHMS783371-supplement-8.pdf [file NIHMS783371-supplement-8.pdf]
